# Supplementary material for: Optimization of lipid assisted polymeric nanoparticles for siRNA delivery and cancer immunotherapy
Source: Royal Society of Chemistry journal article supplement (doi:10.1039/d3bm02071a), 2024-01-01
Supplement: d3bm02071a2.pdf [file d3bm02071a2.pdf]

Figure 1B

Figure 1C

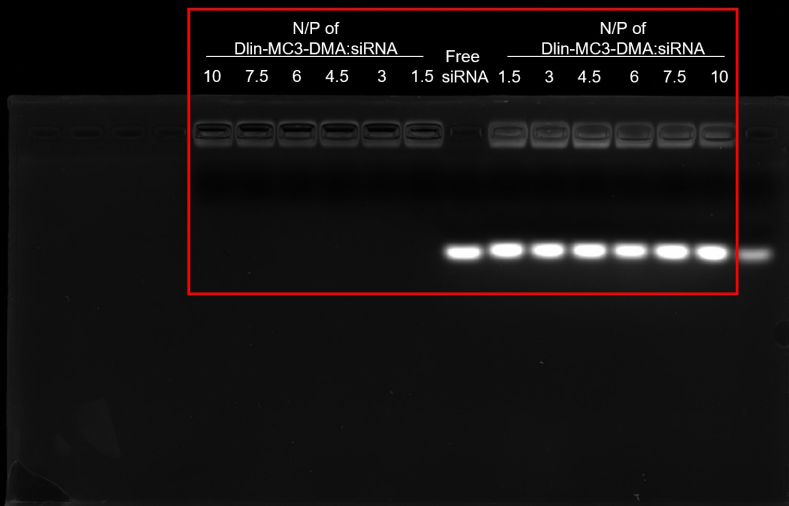

Figure 1B and Figure 1C share a common Free siRNA lane.

Figure 1B was obtained by cropping and flipping the original data.

Figure 1C was obtained by cropping the original data.
