# Supplementary material for: Optimization of lipid assisted polymeric nanoparticles for siRNA delivery and cancer immunotherapy
Source: Royal Society of Chemistry journal article supplement (doi:10.1039/d3bm02071a), 2024-01-01
Supplement: d3bm02071a4.pdf [file d3bm02071a4.pdf]

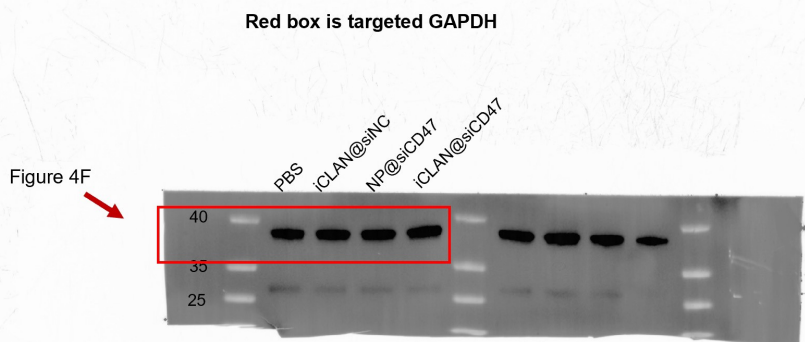

To facilitate the incubation with the primary antibody, we cut the PVDF membrane into two parts, upper and lower, and incubated them separately with the respective antibodies
