# Supplementary figures and images for: Optimization of lipid assisted polymeric nanoparticles for siRNA delivery and cancer immunotherapy
Source: Royal Society of Chemistry journal article supplement (doi:10.1039/d3bm02071a), 2024-01-01

Figure 1A

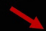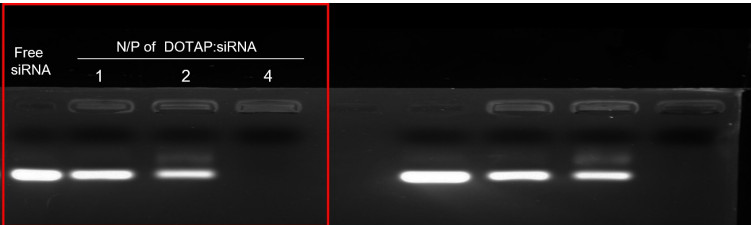

Figure 1A was obtained by cropping the original data.

Supplement: d3bm02071a1.pdf [file d3bm02071a1.pdf]
